# Supplementary material for: How does soil water availability control phytotoxic O&lt;sub&gt;3&lt;/sub&gt; dose tomontane pines? Modelling and experimental study from twocontrasting climatic regions in Europe
Source: Copernicus journal article supplement (doi:10.5194/acp-2017-1005), 2017-11-13
Supplement: Supplementary file 1 [file acp-2017-1005-supplement.pdf]

## Supplementary Information to

# How does soil water availability control phytotoxic O<sub>3</sub> dose to montane pines? Modelling and experimental study from two contrasting climatic regions in Europe

Svetlana Bičárová<sup>1</sup>, Zuzana Sitková<sup>2</sup>, Hana Pavlendová<sup>2</sup>, Peter Fleischer jr.<sup>3</sup>, Peter Fleischer sr.<sup>3</sup>, Laurence Dalstein-Richier<sup>4</sup>, Marie-Lyne Ciriani<sup>4</sup> and Andrzej Bytnerowicz<sup>5</sup>

<sup>1</sup>Earth Science Institute of the Slovak Academy of Sciences, Stará Lesná, 059 60 Tatranská Lomnica, Slovakia

<sup>2</sup>National Forest Centre–Forest Research Institute Zvolen, T. G. Masaryka 22, 960 92 Zvolen, Slovakia

<sup>3</sup>Technical University in Zvolen, T. G. Masaryka 24, 960 92 Zvolen, Slovakia

<sup>4</sup>Groupe International d'Etudes des Forêts Sud-européennes G.I.E.F.S, 69, Avenue des Hespérides, 06300 Nice, France

<sup>5</sup>USDA Forest Service, Pacific Southwest Research Station, 4955 Canyon Crest Drive, Riverside, CA 92507, USA

Correspondence to: Svetlana Bičárová [bicarova@ta3.sk](mailto:bicarova@ta3.sk)

(Supporting Information includes 2 pages, 1 table)

### Part SI-1: Details to section: Methods DO<sub>3</sub>SE model parameterization for version (DO3SE\_INTv3.0.5)

The interface of DO<sub>3</sub>SE model version 3.0 provides a way to parameterise input variables. A collection of parameters according to built-in preset for coniferous forest (CF) was used for model calculation of ozone exposure (AOT40) and phytotoxic dose (PODy) metrics.

**Table S1.** Model parameters for coniferous forest (CF) considering for Swiss stone pine and \*dwarf mountain pine; G<sub>max</sub> built-in preset adjusted from value of 160 to \*\*110 mmol O<sub>3</sub> m<sup>-2</sup> PLA s<sup>-1</sup> according to field measurements in SK–HT

| <b>Input data</b>                                                                                         |                       |
|-----------------------------------------------------------------------------------------------------------|-----------------------|
| O <sub>3</sub> _zR (ppb): Measured O <sub>3</sub> concentration                                           | hourly variables      |
| Ts (°C): Air temperature (AT – abbreviation used in paper)                                                | hourly variables      |
| VPD (kPa): Vapour Pressure Deficit                                                                        | hourly variables      |
| Uh_zR (m s <sup>-1</sup> ): Wind speed                                                                    | hourly variables      |
| Precip (mm): Precipitation                                                                                | hourly variables      |
| P (kPa): Pressure                                                                                         | hourly variables      |
| R (Wh m <sup>-2</sup> ): Global radiation                                                                 | hourly variables      |
| <b>Measurement data</b>                                                                                   |                       |
| O <sub>3</sub> measurement height (m), recalculated                                                       | 20                    |
| O <sub>3</sub> measurement canopy height (m)                                                              | Same as target canopy |
| Wind speed measurement height (m)                                                                         | 10                    |
| Wind speed measurement canopy height (m)                                                                  | Same as target canopy |
| Soil water measurement depth (m)                                                                          | 0.4                   |
| <b>Location properties</b>                                                                                |                       |
| Latitude/Longitude/Elevation                                                                              | variables             |
| Soil texture type: sandy loam (coarse), silt loam (medium coarse), loam (medium coarse), clay loam (fine) | choice of type        |
| Rsoil (s m <sup>-1</sup> ): Soil resistance to the vertical soil water distribution                       | 200                   |
| <b>Vegetation characteristics</b>                                                                         |                       |
| H (m): Canopy height                                                                                      | 20/*2                 |
| Root (m): Root depth                                                                                      | 1.00/*0.5             |
| Lm (m): Cross-wind leaf dimension                                                                         | 0.008                 |
| Albedo (fraction)                                                                                         | 0.12                  |

|                                                                                                                                           |                                        |
|-------------------------------------------------------------------------------------------------------------------------------------------|----------------------------------------|
| $G_{\max}$ (mmol O <sub>3</sub> m <sup>-2</sup> PLA s <sup>-1</sup> ): Maximum stomatal conductance to O <sub>3</sub>                     | **110                                  |
| Sun/shade factor (fraction)                                                                                                               | 1.00                                   |
| $f_{\min}$ (fraction): Minimum stomatal conductance to O <sub>3</sub>                                                                     | 0.10                                   |
| $R_{\text{ext}}$ (s m <sup>-1</sup> ): External plant cuticule resistance                                                                 | 2,500                                  |
| Threshold Y for PODy (nmol m <sup>-2</sup> s <sup>-1</sup> )                                                                              | 1.00                                   |
| $G_{\text{sto0}}$ (μmol m <sup>-2</sup> s <sup>-1</sup> ): Closed stomata conductance                                                     | 30,000                                 |
| m (dimensionless): Species-specific sensitivity to An                                                                                     | 16.83                                  |
| $V_{\text{cmax}}$ (μmol m <sup>-2</sup> s <sup>-1</sup> ): Maximum catalytic rate at 25°C                                                 | 30.00                                  |
| $J_{\text{cmax}}$ (μmol m <sup>-2</sup> s <sup>-1</sup> ): Maximum rate of electron transport at 25°C                                     | 60.00                                  |
| <b>Environmental response</b>                                                                                                             |                                        |
| light <sub>a</sub> (dimensionless): Species-specific parameter for response $G_{\text{sto}}$ to photosynthetic photon flux density (PPFD) | 0.008                                  |
| $T_{\min}$ (°C): Minimum temperature for $G_{\text{sto}}$                                                                                 | 1                                      |
| $T_{\text{opt}}$ (°C): Optimum temperature for $G_{\text{sto}}$                                                                           | 18                                     |
| $T_{\max}$ (°C): Maximum temperature for $G_{\text{sto}}$                                                                                 | 36                                     |
| $VPD_{\min}$ (kPa): Vapour pressure deficit for min. $G_{\text{sto}}$                                                                     | 3.3                                    |
| $VPD_{\max}$ (kPa): Vapour pressure deficit for max. $G_{\text{sto}}$                                                                     | 0.6                                    |
| $SWP_{\min}$ (MPa): Soil water potential for min. $G_{\text{sto}}$                                                                        | -1.20                                  |
| $SWP_{\max}$ (MPa): Soil water potential for max. $G_{\text{sto}}$                                                                        | -0.76                                  |
| <b>Model options</b>                                                                                                                      |                                        |
| Stomatal conductance model                                                                                                                | Multiplicative                         |
| Leaf temperature calculation                                                                                                              | Estimate                               |
| fO <sub>3</sub> calculation                                                                                                               | Not used (fO <sub>3</sub> =1)          |
| Soil water influence on $G_{\text{sto}}$                                                                                                  | Use fSWP                               |
| LWP calculation                                                                                                                           | Steady-state (SS)                      |
| fSWP calculation                                                                                                                          | Linear ( $SWP_{\min}$ , $SWP_{\max}$ ) |
| <b>Season</b>                                                                                                                             | 1 April–30 September 2016              |
| SGS: Start of growing season                                                                                                              | 92                                     |
| EGS: End of growing season                                                                                                                | 275                                    |
| LAI <sub>a</sub> (m <sup>2</sup> m <sup>-2</sup> ): Leaf area index at SGS                                                                | 3.4                                    |
| LAI <sub>b</sub> (m <sup>2</sup> m <sup>-2</sup> ): Leaf area index at first mid-season                                                   | 4.5                                    |
| LAI <sub>c</sub> (m <sup>2</sup> m <sup>-2</sup> ): Leaf area index at second mid-season                                                  | 4.5                                    |
| LAI <sub>d</sub> (m <sup>2</sup> m <sup>-2</sup> ): Leaf area index at EGS                                                                | 3.4                                    |
| LAI <sub>1</sub> (days): Period from LAI <sub>a</sub> to LAI <sub>b</sub>                                                                 | 30                                     |
| LAI <sub>2</sub> (days): Period from LAI <sub>c</sub> to LAI <sub>d</sub>                                                                 | 10                                     |
| SAI (surface area index) calculation                                                                                                      | Forest                                 |
| <b>Phenology function fphen</b>                                                                                                           |                                        |
| fphen <sub>a</sub> : fphen at SGS                                                                                                         | 1.0                                    |
| fphen <sub>b</sub> : fphen at mid-season                                                                                                  | 1.0                                    |
| fphen <sub>c</sub> : fphen at second mid-season                                                                                           | 1.0                                    |
| fphen <sub>d</sub> : fphen at third mid-season                                                                                            | 1.0                                    |
| fphen <sub>e</sub> : fphen at EGS                                                                                                         | 1.0                                    |
| fphen <sub>1</sub> (days): Period from fphen <sub>a</sub> to fphen <sub>b</sub>                                                           | 0                                      |
| fphen <sub>limA</sub> (day of year): Start of SWP limitation                                                                              | 0                                      |
| fphen <sub>2</sub> (days): Period from fphen <sub>b</sub> to fphen <sub>c</sub>                                                           | 0                                      |
| fphen <sub>3</sub> (days): Period from fphen <sub>c</sub> to fphen <sub>d</sub>                                                           | 0                                      |
| fphen <sub>limB</sub> (day of year): End of SWP limitation                                                                                | 0                                      |
| fphen <sub>4</sub> (days) (days): Period from fphen <sub>d</sub> to fphen <sub>e</sub>                                                    | 0                                      |
| <b>Leaf fphen calculation</b>                                                                                                             | Same as fphen                          |
